# Supplementary material
Source: PubMed Central journal article supplement (PMC7935068)

Extended Data Figure 10g

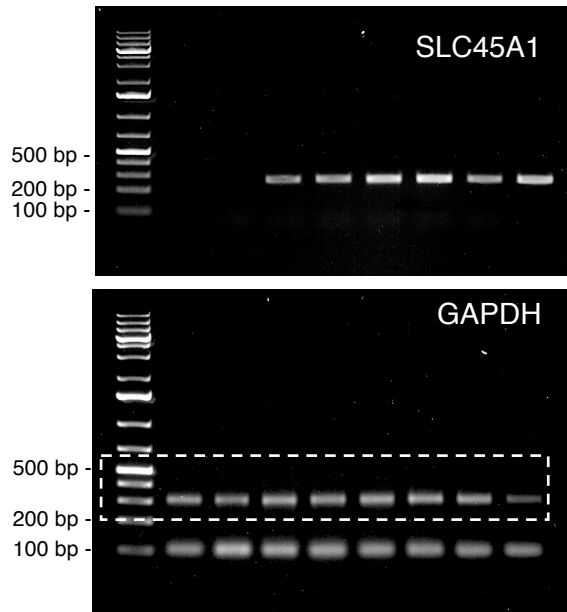

Extended Data Figure 10h

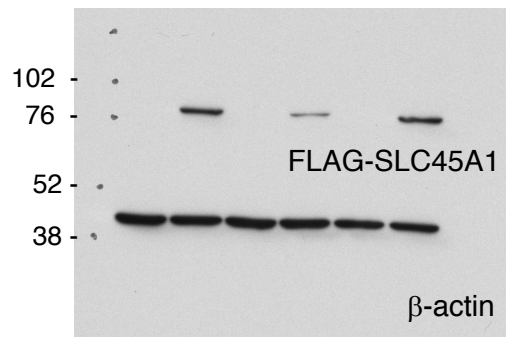

Supplement: NIHMS1668887-supplement-Source_Data_Fig__10.pdf [file NIHMS1668887-supplement-Source_Data_Fig__10.pdf]

Figure 5h

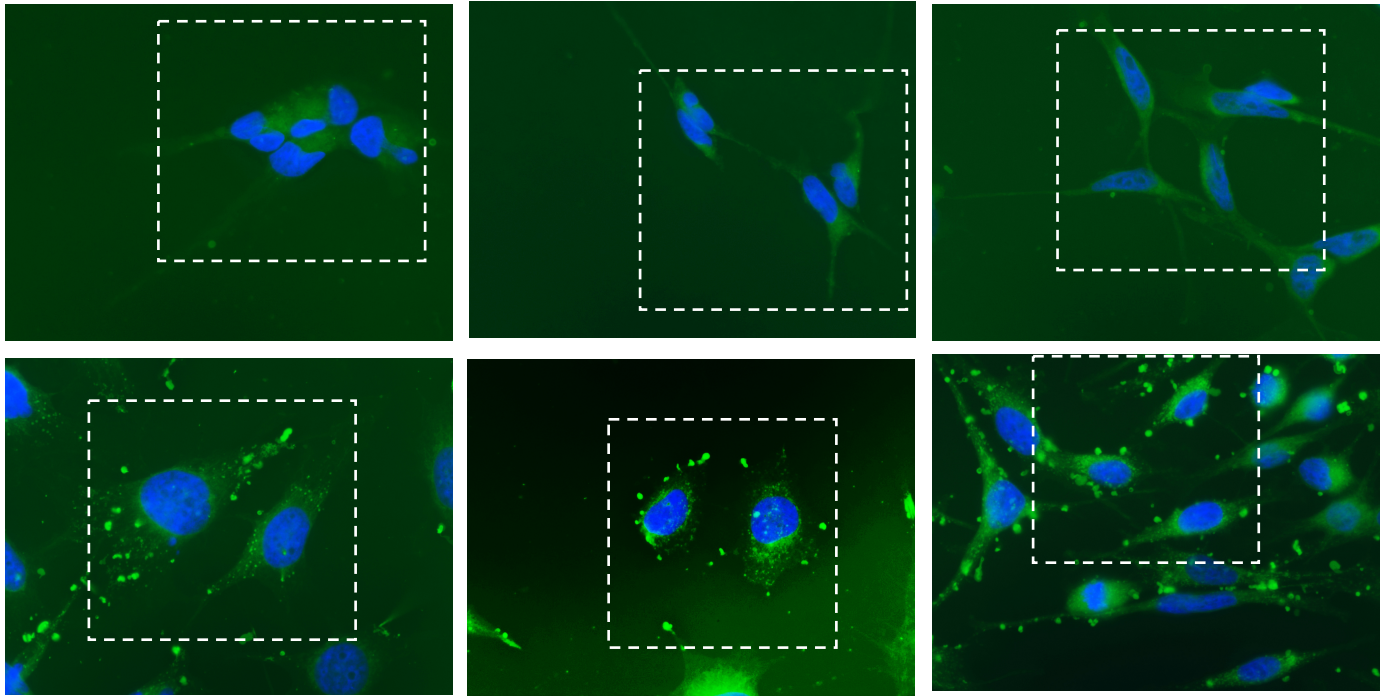

Supplement: NIHMS1668887-supplement-Source_Data_Fig__5_I.pdf [file NIHMS1668887-supplement-Source_Data_Fig__5_I.pdf]

Figure 6c

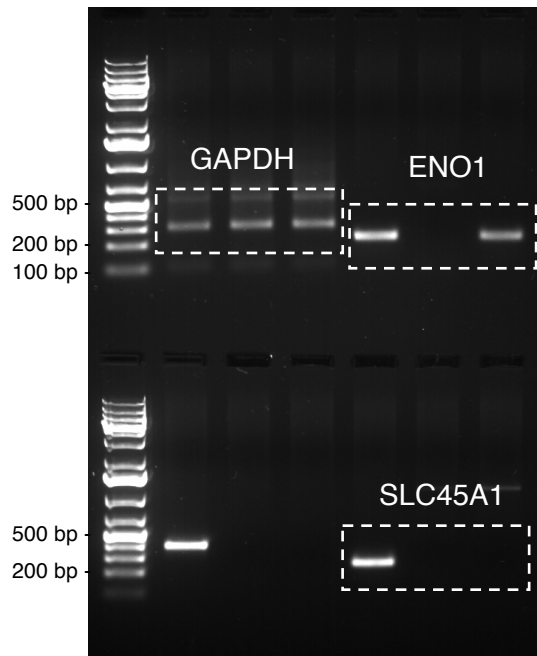

Supplement: NIHMS1668887-supplement-Source_Data_Fig__6.pdf [file NIHMS1668887-supplement-Source_Data_Fig__6.pdf]

Figure 7b

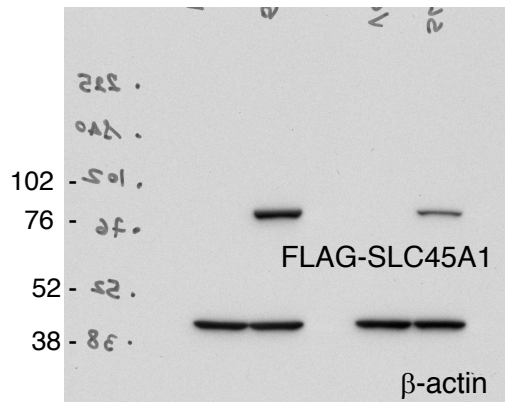

Figure 7f

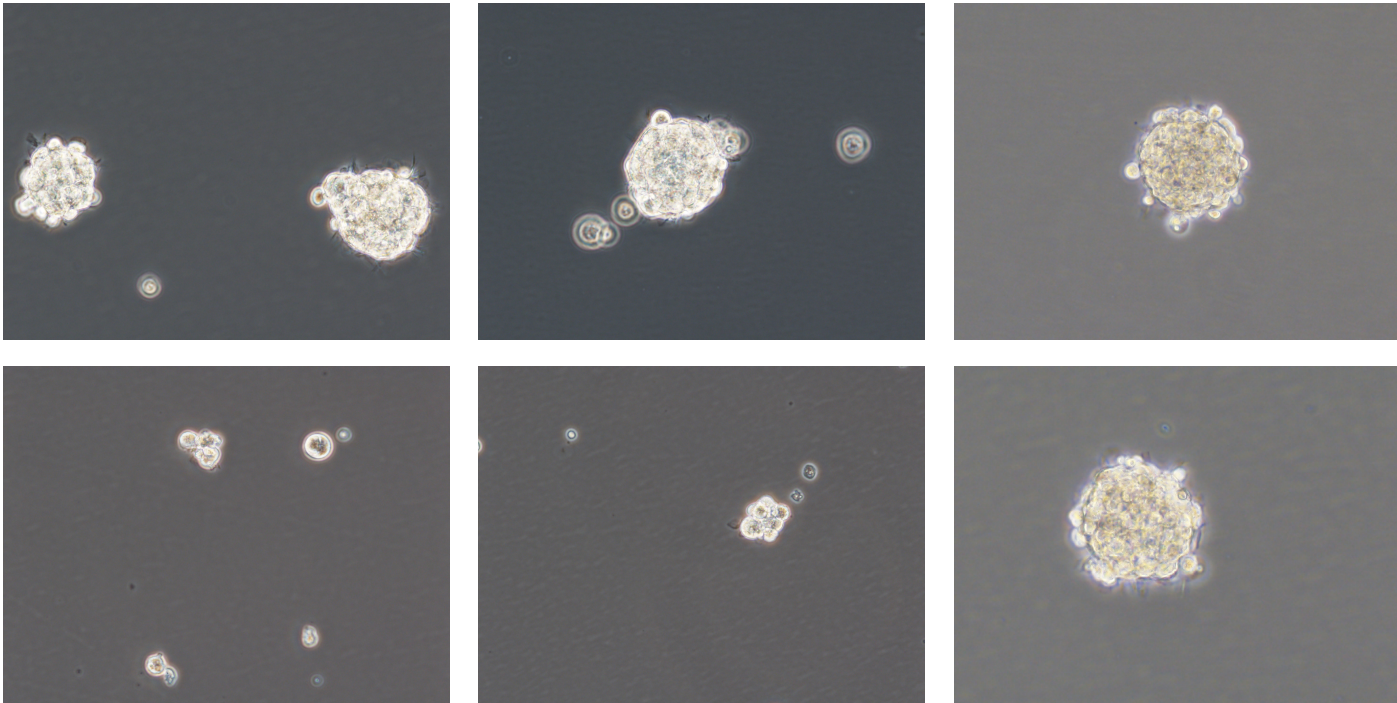

Figure 7h

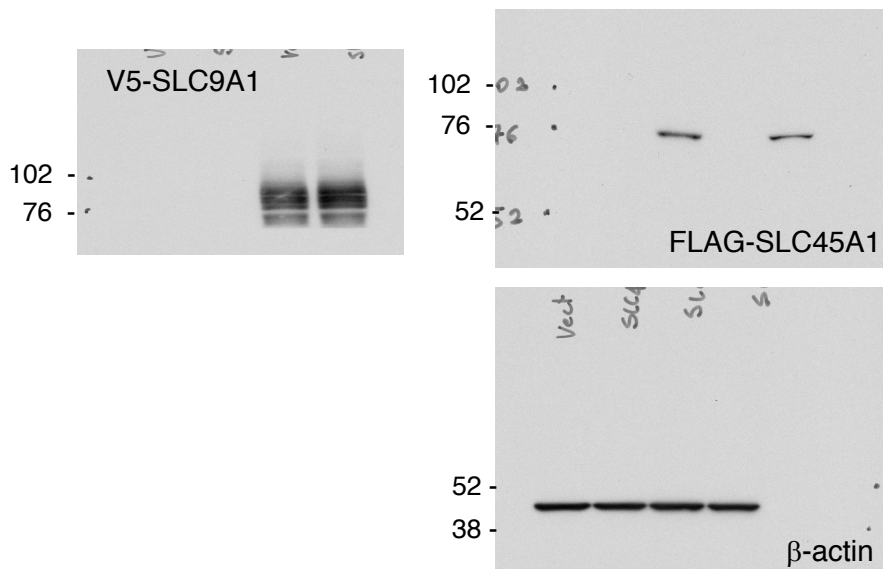

Supplement: NIHMS1668887-supplement-Source_Data_Fig__7_I.pdf [file NIHMS1668887-supplement-Source_Data_Fig__7_I.pdf]
